# Supplementary material
Source: Springer Nature journal article supplement (https://www.springermedizin.de/resource/supplementary/12888_2014_1554_MOESM1_ESM.pdf/9481366)
Supplement: MOESM1 [file 9481366]

# Screening of GAD-diagnosis

Participants with a GAD-diagnosis based on the DSM-V criteria (N = 60)

Randomisation

n = 20

n = 20

n = 20

Manualized CBT protocol for GAD

**Adherence priming**

mid (6-week) & post (14-week assessment)

6-month follow up

Manualized CBT protocol for GAD

**Resource priming**

mid (6-week) & post (14-week assessment)

6-month follow up

Manualized CBT protocol for GAD

**Supportive resource priming**

mid (6-week) & post (14-week assessment)

6-month follow up
